# Supplementary material for: End-chain fluorination of polyesters favors perfluorooctyl bromide encapsulation into echogenic PEGylated nanocapsules
Source: Royal Society of Chemistry journal article supplement (doi:10.1039/c7py00400a), 2017-01-01
Supplement: c7py00400a1.pdf [file c7py00400a1.pdf]

## Supporting information

### Calculation of PFOB encapsulation efficiency

A calibration curve with five solutions of known concentration of PFOB in chloroform was established. PFOB solutions were collected and introduced into a usual 5mm-NMR sample tube loaded with a stem coaxial insert containing TFA in D<sub>2</sub>O as an external standard ([TFA]= 9.4 μmol.mL<sup>-1</sup>). The same insert was used for all solutions and the integration of the TFA peak at -76.5 ppm was set to 3. A typical <sup>19</sup>F NMR spectrum is shown below.

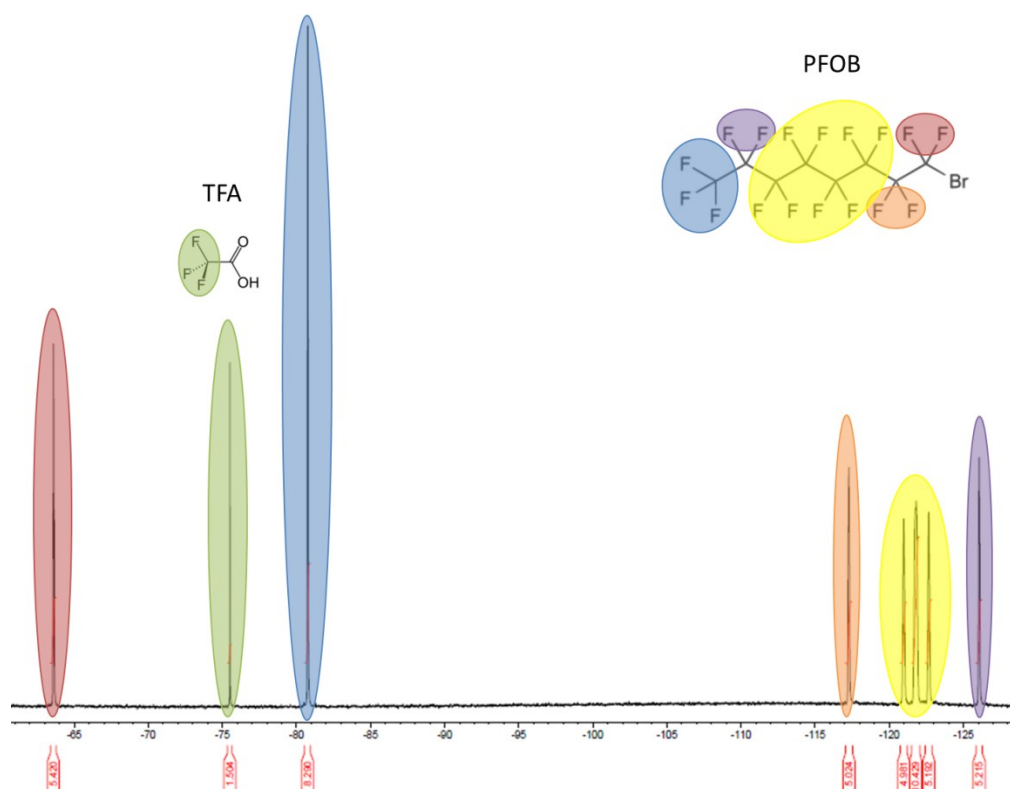

Integrations of the peak at -64.7 ppm corresponding to the CF<sub>2</sub>Br group of PFOB were drawn as a function of PFOB concentration. A typical calibration curve is shown below.

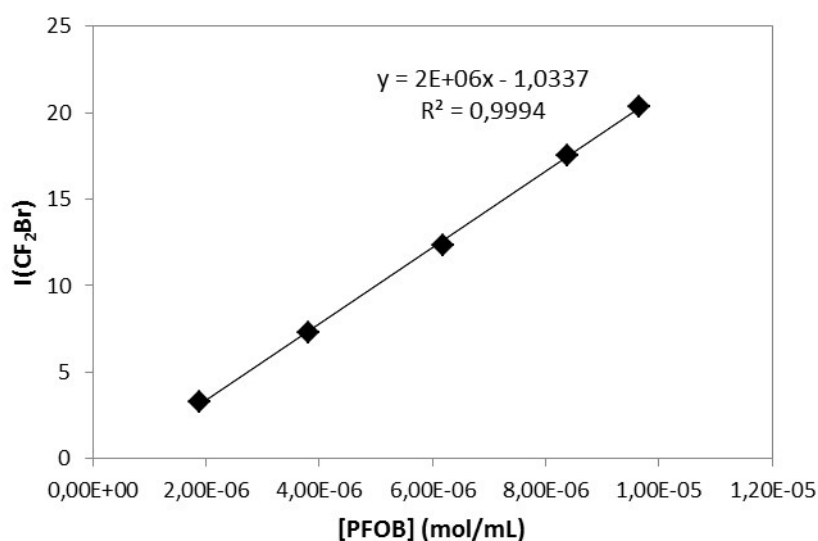

For each NCs sample, the integration of the TFA peak was set to 3 and the resulting integration of the CF<sub>2</sub>Br peak was used to calculate the concentration of PFOB in the tube with the equation of the curve, and therefore the amount of encapsulated PFOB  $n_{PFOB}$ . Absolute encapsulation efficiency  $\eta_{encaps}$  was then calculated as follows:

$$\eta_{encaps} = \frac{n_{PFOB}}{n_{PFOB}^{max}} \quad \text{with} \quad n_{max} = \frac{m_{PFOB}^{feed} \cdot m_{NC}}{M_{PFOB} m_{PFOB}^{feed} + m_{polymer}^{feed} + m_{SC}^{feed}}$$

where  $m_{PFOB}^{feed}$ ,  $m_{polymer}^{feed}$  and  $m_{SC}^{feed}$  are the initial masses of the components introduced during NCs preparation,  $m_{NC}$  corresponds to the mass of NCs recovered after freeze-drying and  $M_{PFOB}$  is the molar mass of PFOB (498.96 g/mol).

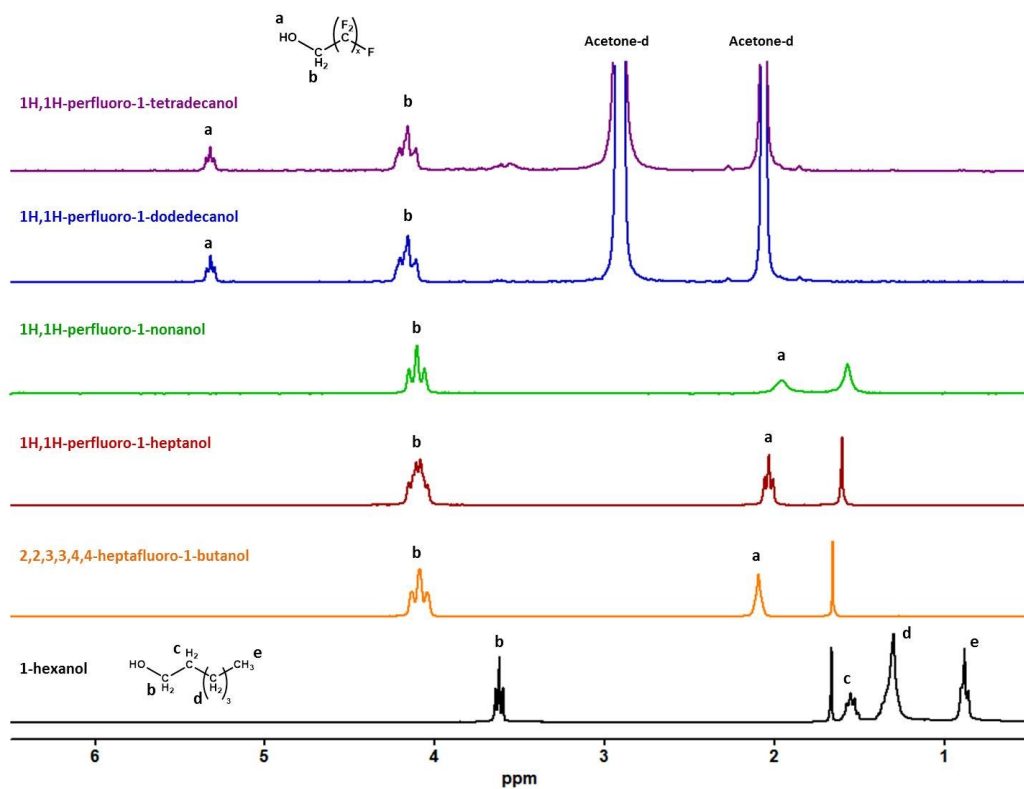

Figure S1:  $^1\text{H}$  NMR spectra of the initiators used for polymers synthesis. All initiators were dissolved in  $\text{CDCl}_3$  except 1H, H-perfluoro-1-tetradecanol and 1H,1H-perfluoro-1-dodecanol that were dissolved in acetone-d

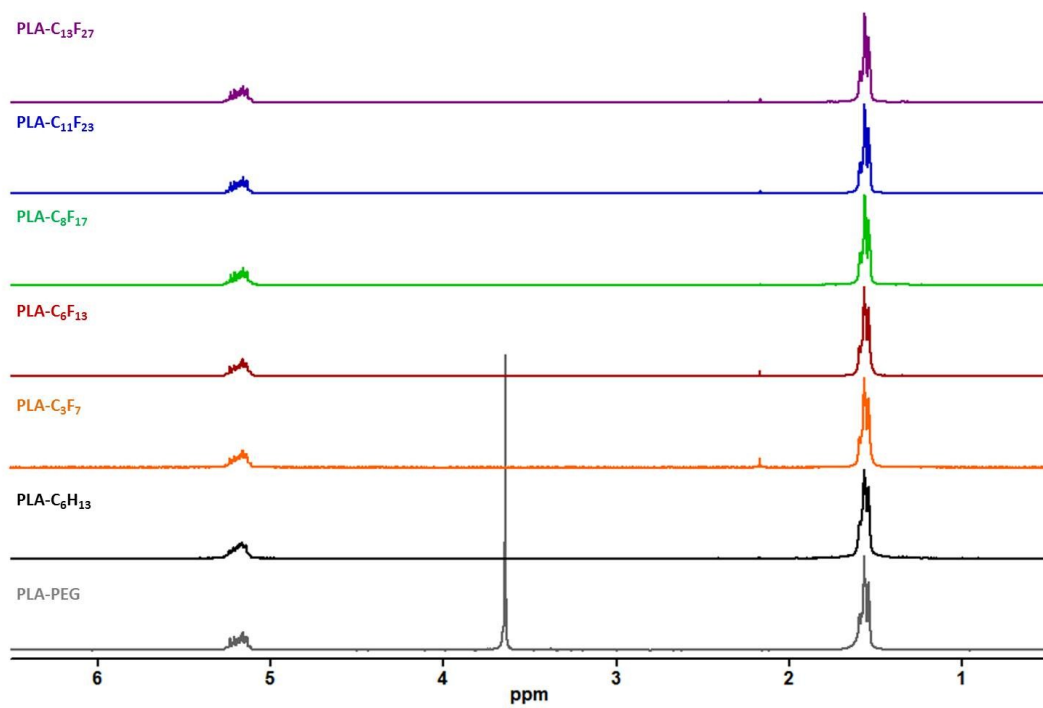

Figure S2:  $^1\text{H}$  NMR spectra of all synthesized polymers in  $\text{CDCl}_3$

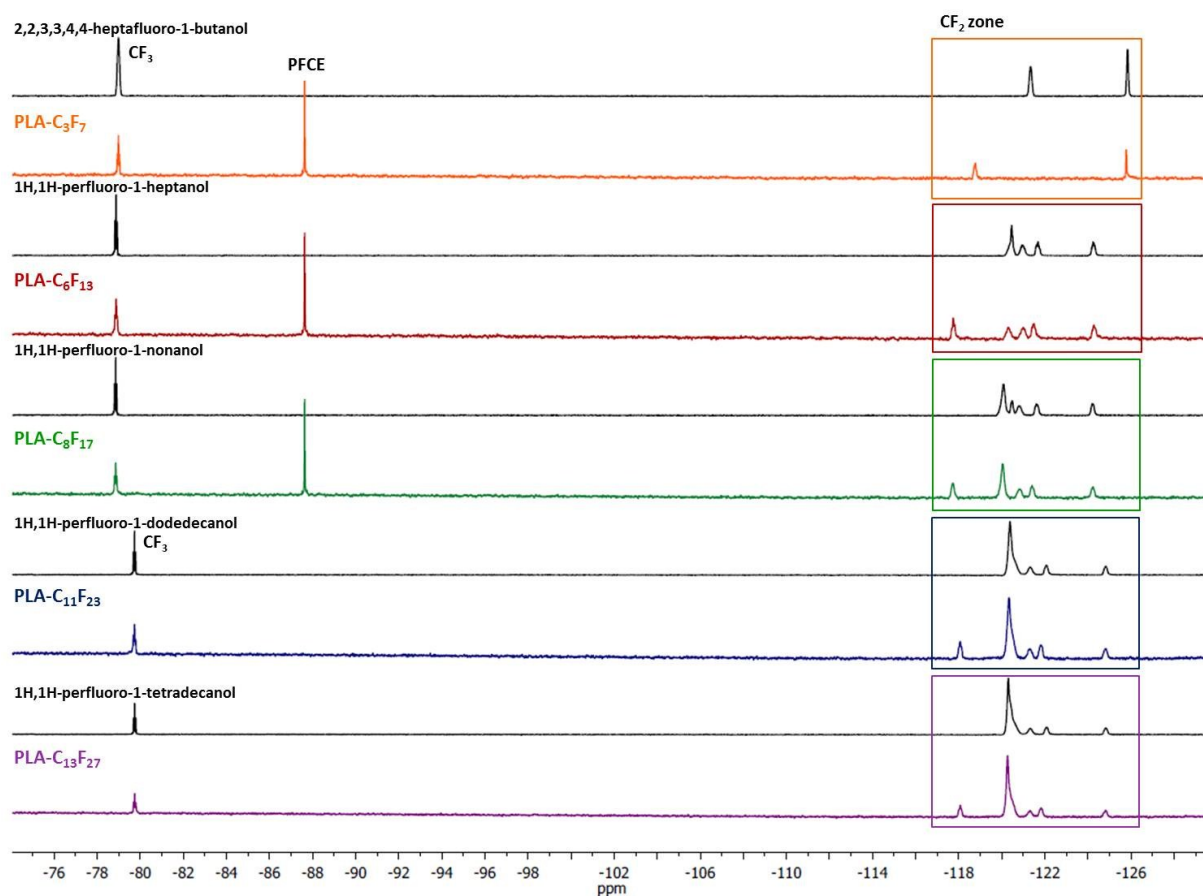

Figure S3:  $^{19}\text{F}$  NMR spectra of the fluorinated polymers (color) and their corresponding fluorinated initiators (black) showing the shifts in the  $\text{CF}_2$  zone.  $\text{PLA-C}_3\text{F}_7$ ,  $\text{PLA-C}_6\text{F}_{13}$  and  $\text{PLA-C}_8\text{F}_{17}$  were dissolved in  $\text{CDCl}_3$  with PFCE, their corresponding initiators in  $\text{CDCl}_3$  without PFCE.  $\text{PLA-C}_{11}\text{F}_{23}$  and  $\text{PLA-C}_{13}\text{F}_{27}$  and their corresponding fluorinated initiators were dissolved in acetone-d

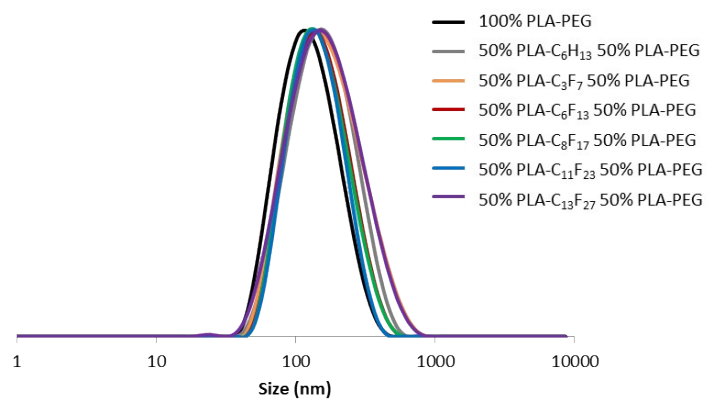

Figure S4: DLS intensity distribution of nanocapsules made from 50 mg of polymer

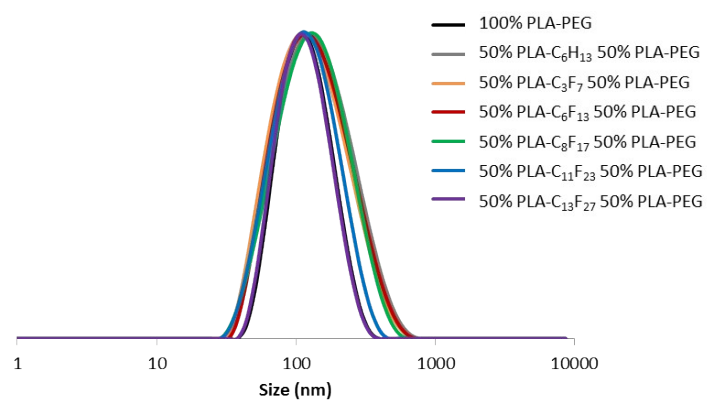

Figure S5: DLS intensity distribution of nanocapsules made from 30 mg of polymer

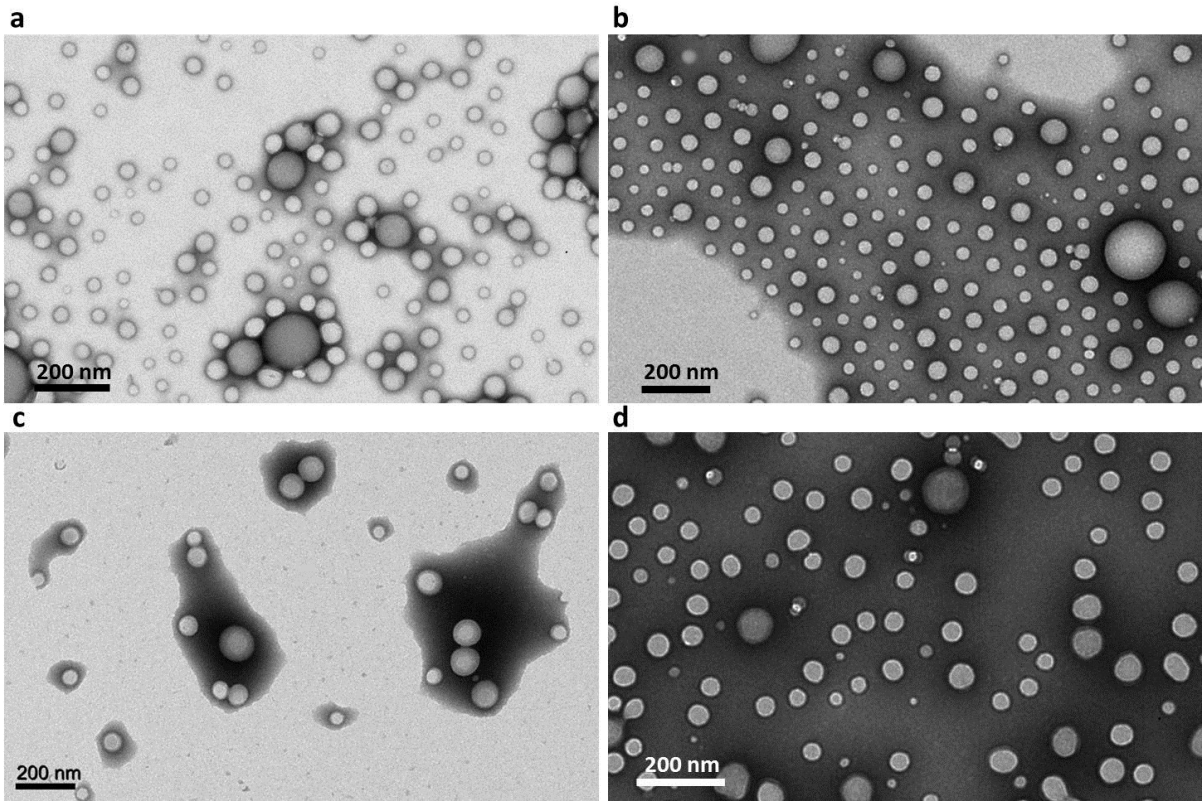

Figure S6: TEM images of NCs made from 50% PLA-C<sub>8</sub>F<sub>17</sub> / 50% PLA-PEG at 50 mg (a) and 30 mg (b), and NCs made from 100% PLA-PEG at 50 mg (c) and 30 mg (d) with negative staining

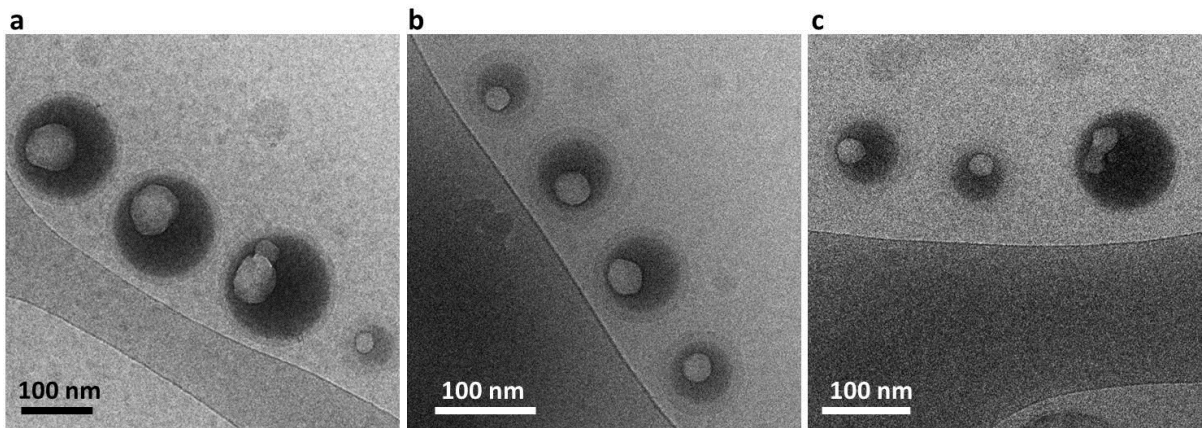

Figure S7: Cryo-TEM images of NCs made from 50% PLA-C<sub>8</sub>F<sub>17</sub> / 50% PLA-PEG at 50 mg (a) and NCs made from 100% PLA-PEG at 50 mg (b) and 30 mg (c)

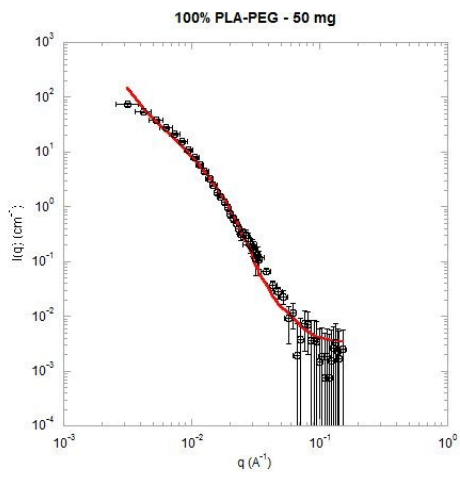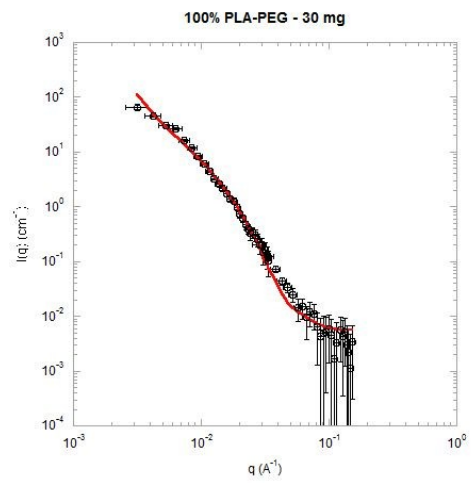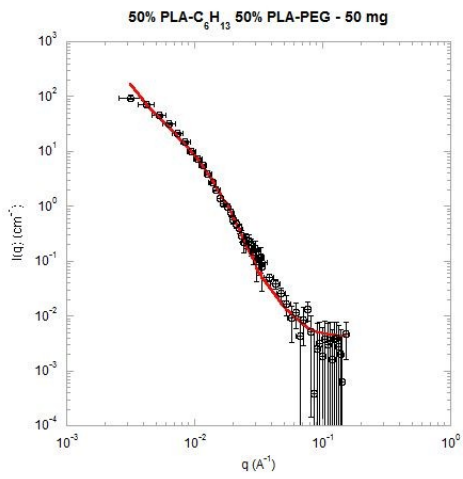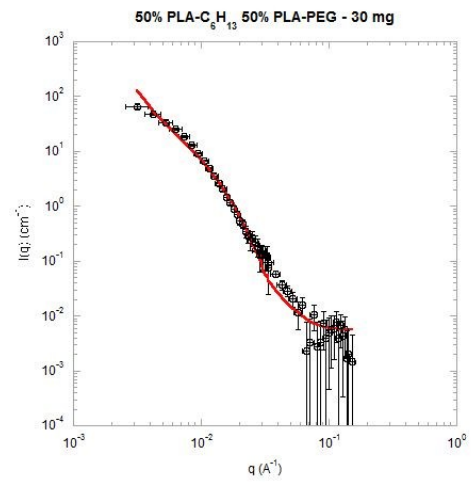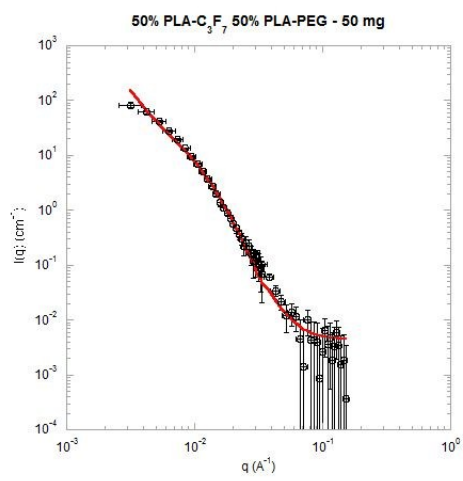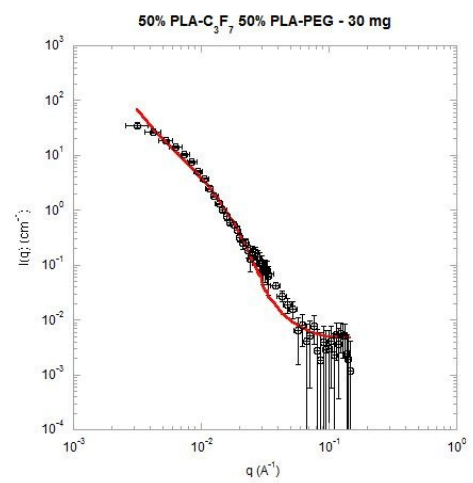



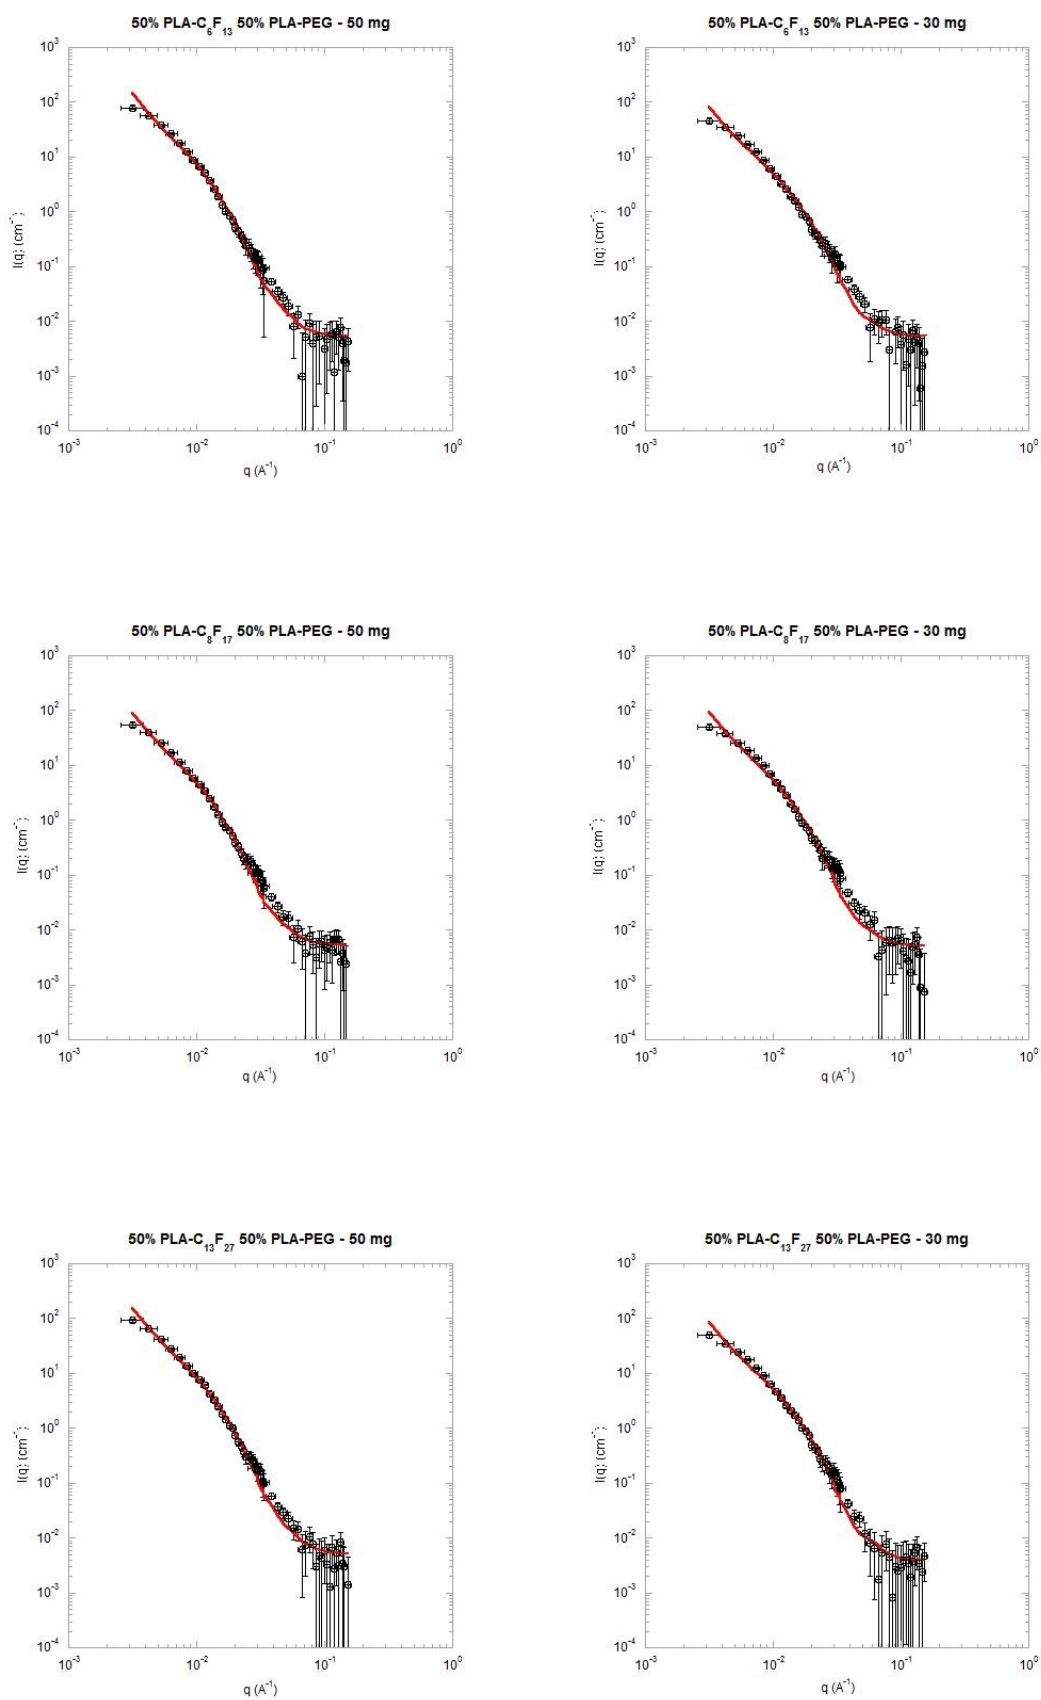

Figure S8: Experimental scattered intensity curves (black circles) in PFOB matching condition fitted with the vesicle model (red line)

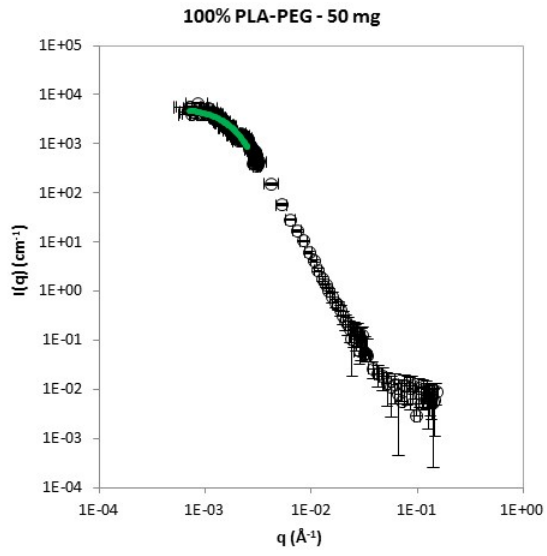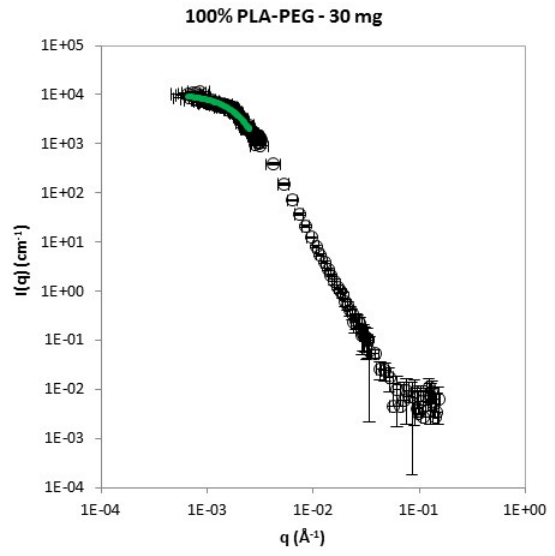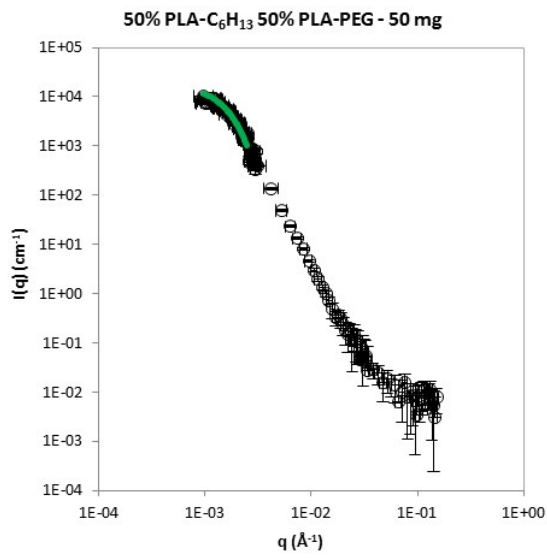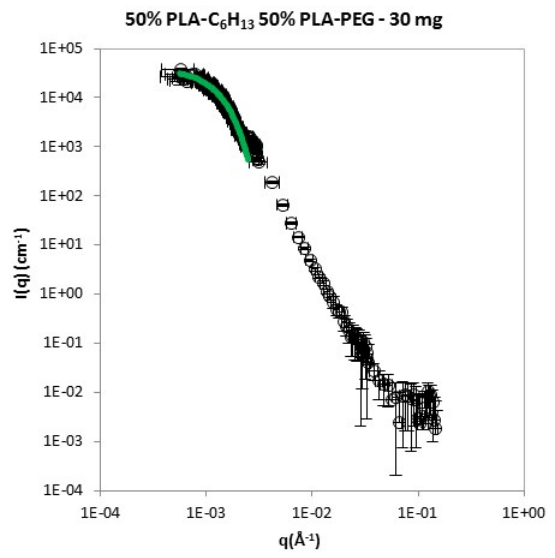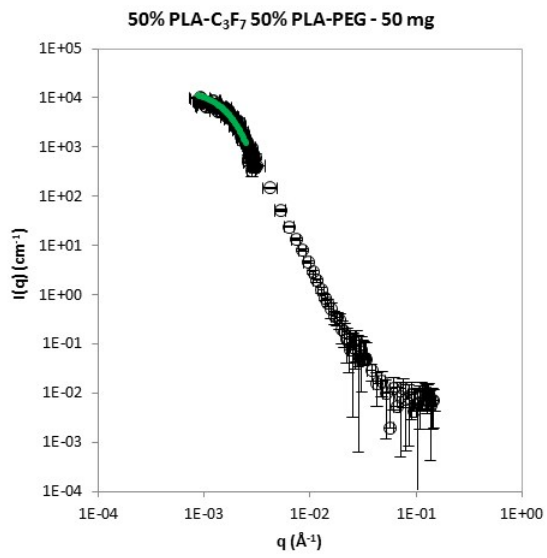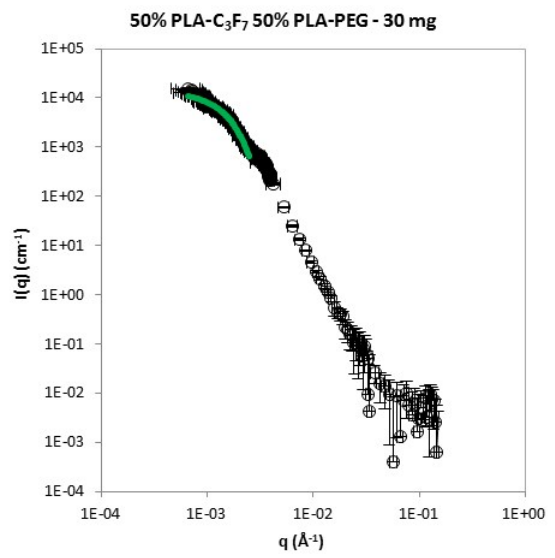

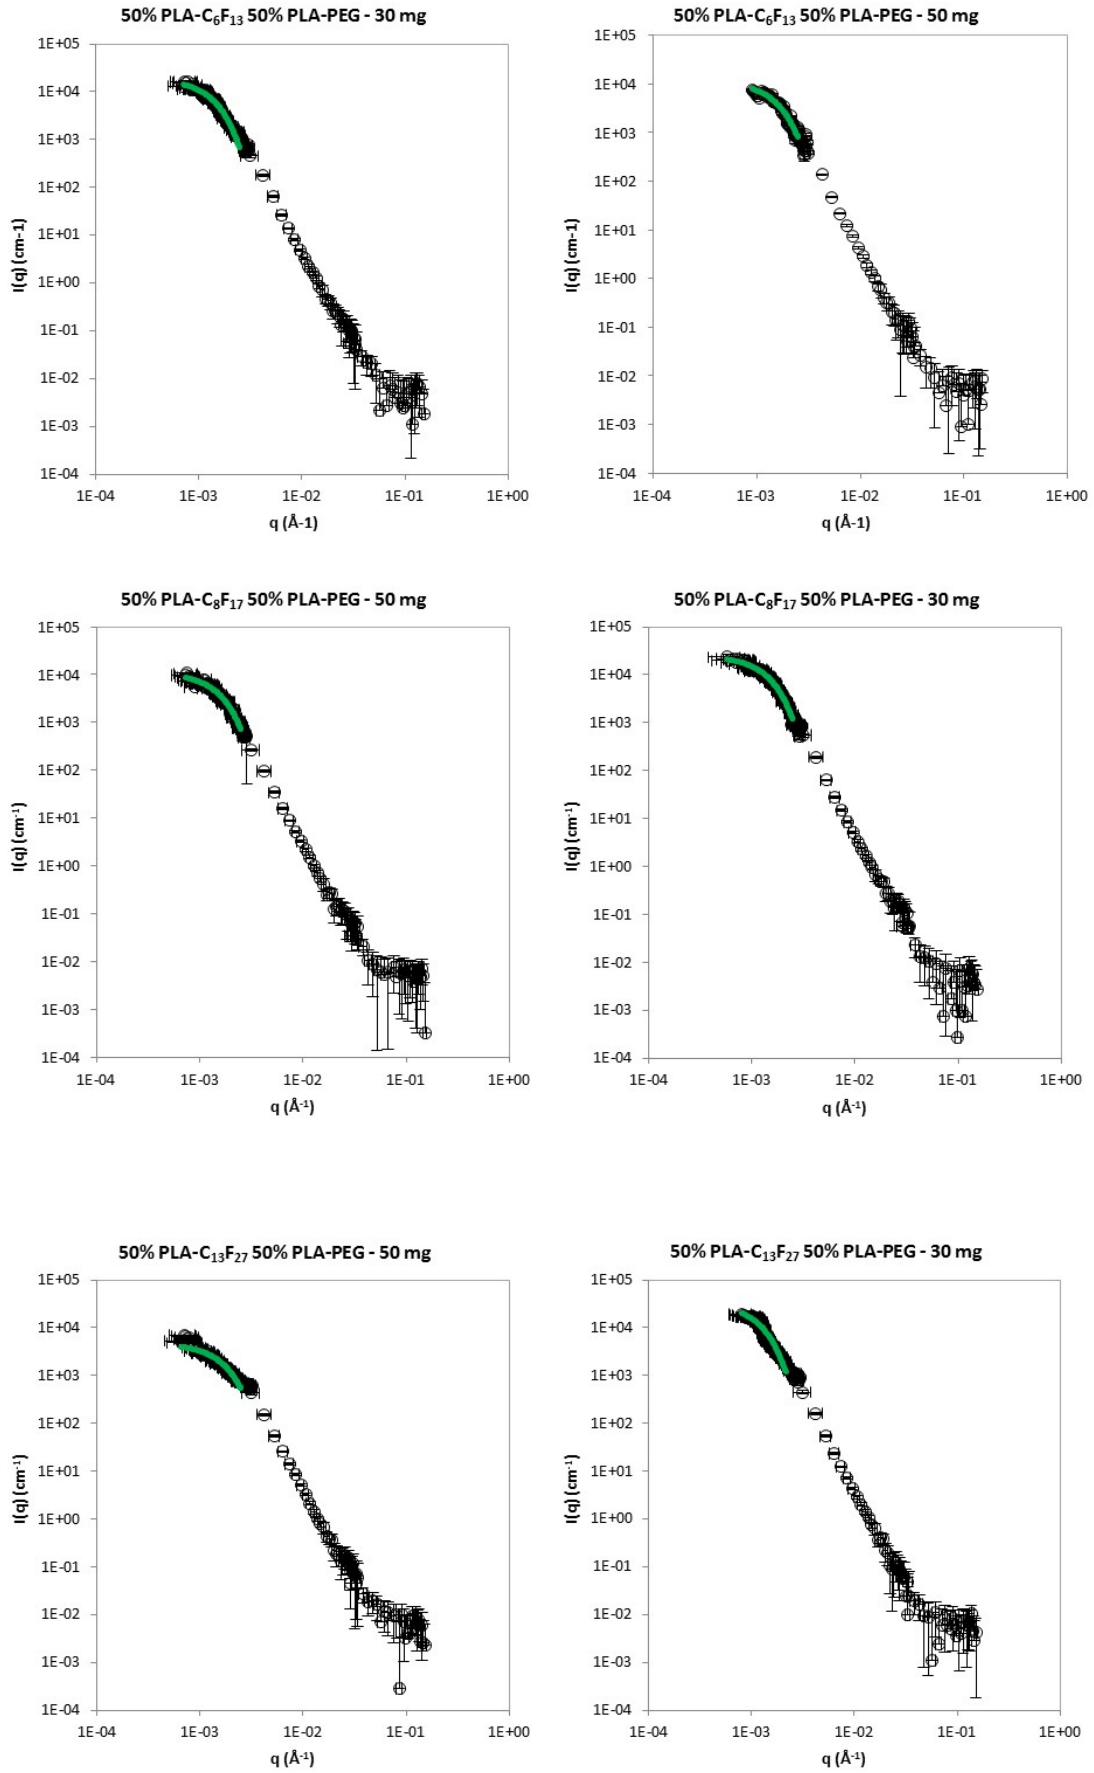

Figure S9: Experimental scattered intensity curves (black circles) in PLA matching condition fitted with the Guinier approximation for  $q < 0.0025 \text{\AA}^{-1}$  (green line)

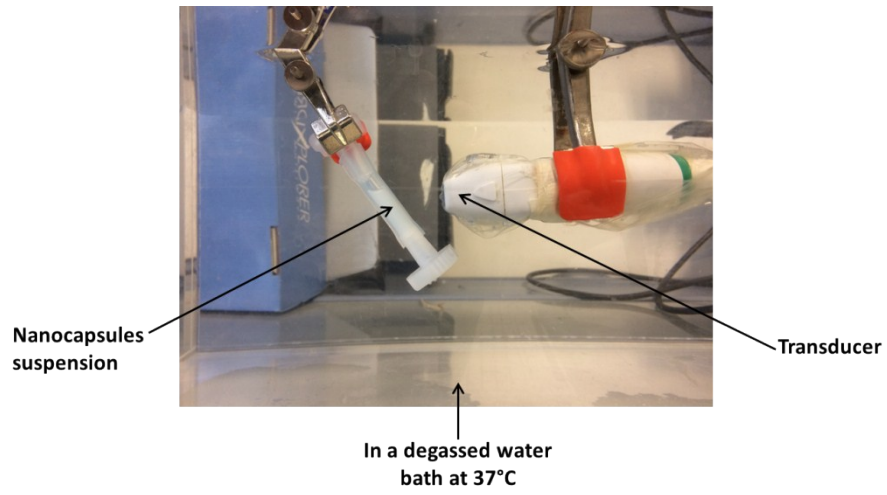

**Figure S10 : Picture of the ultrasound imaging set-up**
